# Supplementary material
Source: MDPI journal article supplement (https://www.mdpi.com/1999-4907/8/6/214)
Supplement: s1 [file s1]

**Table S1.** Characteristics of 70-year-old naturally regenerated Korean red pine stands at the Gwangneung Experimental Forest in central Korea in 2006 and 2014. The numbers represent the mean ± one standard error (*n* = 6).

| **Stand Characteristics** | **2006** | **2014** | **∆ (year−1)** |
| --- | --- | --- | --- |
| Total number of stems (trees ha−1) | 1288 ± 127 | 1104 ± 86 | - 23 |
| Red pine | 675 ± 112 | 592 ± 90 | - 10 |
| Deciduous species | 613 ± 64 | 513 ± 57 | - 13 |
| Mean diameter of breast height (cm) | 18.4 ± 0.7 | 20.8 ± 0.7 | + 0.30 |
| Red pine | 28.2 ± 2.1 | 31.2 ± 2.1 | + 0.38 |
| Deciduous species | 8.9 ± 0.4 | 10.2 ± 0.5 | + 0.17 |
| Total basal area (m2 ha−1) | 44.7 ± 2.6 | 47.8 ± 2.4 | + 0.38 |
| Red pine | 40.3 ± 2.8 | 42.8 ± 2.6 | + 0.32 |
| Deciduous species | 4.4 ± 0.5 | 5.0 ± 0.6 | + 0.06 |
| Aboveground biomass (Mg ha−1) | 167.5 ± 10.4 | 187.7 ± 10.3 | + 2.53 |
| Red pine | 147.4 ± 11.1 | 164.4 ± 11.7 | + 2.11 |
| Deciduous species | 20.1 ± 2.7 | 23.4 ± 3.1 | + 0.41 |

**Table S2.** Statistical results of a two-way ANOVA for the effects of season, components, and their interactions on C and N concentrations, and C:N ratio in fine litter in 2008. *DF* means degrees of freedom.

| **Factors** | ***DF*** | **C Concentration** | | **N Concentration** | | **C:N Ratio** | |
| --- | --- | --- | --- | --- | --- | --- | --- |
| ***F*** | ***P*** | ***F*** | ***P*** | ***F*** | ***P*** |
| Season 1 | 3 | 215.94 | < 0.0001 | 23.26 | < 0.0001 | 32.11 | < 0.0001 |
| Component 2 | 4 | 525.02 | < 0.0001 | 262.87 | < 0.0001 | 461.19 | < 0.0001 |
| Season × Component | 12 | 67.75 | < 0.0001 | 8.14 | < 0.0001 | 6.83 | < 0.0001 |

1 To determine the effect of season, samples were collected in January, April, July, and October for winter, spring, summer, and fall, respectively. 2 The components consisted of needle, broad leaf, branch (and twig), bark, and miscellaneous parts (e.g., cones and very fine fragments).

**Table S3.** C and N concentrations of fine litter components depending on season in a naturally regenerated Korean red pine forest in 2008. The numbers represent the mean ± one standard error (*n* = 18). The numbers with different superscripted small and capital letters differed significantly among components in the same season and among seasons for the same component, respectively (*P* < 0.05).

|  | **Litter Fraction** | **Winter** | **Spring** | **Summer** | **Fall** |
| --- | --- | --- | --- | --- | --- |
| C (%) | Needle | 52.67 ± 0.09aB | 52.91 ± 0.12aB | 54.03 ± 0.16aA | 51.74 ± 0.16aB |
| Broad leaf | 46.42 ± 0.26cC | 47.93 ± 0.31cB | 49.68 ± 0.18cA | 48.76 ± 0.19dB |
| Branch | 52.60 ± 0.26aA | 52.62 ± 0.27abA | 53.39 ± 0.27aA | 52.49 ± 0.26aA |
| Bark | 51.43 ± 0.14bA | 51.53 ± 0.13bA | 51.98 ± 0.24bA | 51.46 ± 0.17bA |
| Miscellaneous parts | 51.61 ± 0.44bA | 52.10 ± 0.48abA | 51.62 ± 0.21bA | 49.91 ± 0.30cB |
| N (%) | Needle | 0.825 ± 0.019bD | 1.139 ± 0.021aB | 1.423 ± 0.011bA | 0.884 ± 0.018bC |
| Broad leaf | 1.277 ± 0.083aB | 1.197 ± 0.058aB | 2.896 ± 0.065aA | 1.139 ± 0.023aB |
| Branch | 0.845 ± 0.062bA | 0.647 ± 0.019bB | 0.854 ± 0.027dA | 0.647 ± 0.018cB |
| Bark | 0.282 ± 0.016cAB | 0.238 ± 0.011cB | 0.320 ± 0.021eA | 0.302 ± 0.016dA |
| Miscellaneous parts | 1.007 ± 0.076bA | 0.540 ± 0.065bB | 1.066 ± 0.055cA | 0.677 ± 0.063cB |
| C:N ratio | Needle | 64.46 ± 1.59bB | 46.73 ± 0.92dC | 37.98 ± 0.29cD | 73.85 ± 1.68bA |
| Broad leaf | 38.97 ± 2.47cA | 41.45 ± 1.74dA | 17.29 ± 0.36dB | 43.15 ± 0.93cA |
| Branch | 67.20 ± 4.45bB | 82.65 ± 2.72cA | 63.53 ± 2.04bB | 82.17 ± 2.40bA |
| Bark | 192.53 ± 10.12aAB | 224.18 ± 10.23aA | 173.24 ± 10.23aB | 178.25 ± 7.95aB |
| Miscellaneous parts | 53.41 ± 4.59bcBC | 119.02 ± 12.04bA | 50.96 ± 2.92bcC | 82.98 ± 6.28bB |

**Table S4.** Wood density (WD), moisture content (CMC), C and N concentrations, and C:N ratio of coarse woody debris (CWD) logs according to decay classes in a naturally regenerated Korean red pine forest in 2007. The numbers represent the mean ± one standard error and the numbers with different superscripted letters differed significantly among decay classes within species (*P* < 0.05).

| **Species** | **Decay Class** | **WD (g cm**−**3)** | **CMC (g g**−1**)** | ***n*** | **C (%)** | **N (%)** | **C:N Ratio** | ***n*** |
| --- | --- | --- | --- | --- | --- | --- | --- | --- |
| Red pine | I | 0.48 ± 0.03a | 0.22 ± 0.11b | 4 | 51.3 ± 0.8a | 0.15 ± 0.03c | 343.6 ± 48.1a | 6 |
| II | 0.37 ± 0.01b | 0.27 ± 0.05b | 24 | 49.9 ± 0.6b | 0.22 ± 0.03b | 224.7 ± 28.7b | 6 |
| III | 0.28 ± 0.01c | 0.33 ± 0.04b | 34 | 49.8 ± 0.6b | 0.24 ± 0.04b | 207.5 ± 31.3b | 6 |
| IV | 0.23 ± 0.02c | 0.91 ± 0.09a | 6 | 48.8 ± 0.3b | 0.42 ± 0.11a | 124.3 ± 37.1c | 6 |
| V | 0.14 | 2.37 | 1 | n.a. | n.a. | n.a. | 0 |
| Deciduous species | I | 0.36 | 0.39 | 1 | n.a. | n.a. | n.a. | 0 |
| II | 0.36 ± 0.03a | 0.34 ± 0.19a | 8 | 48.5 ± 0.3a | 0.21 ± 0.04a | 239.2 ± 50.9a | 6 |
| III | 0.27 ± 0.02b | 0.62 ± 0.15a | 15 | 50.9 ± 2.5a | 0.68 ± 0.56a | 154.3 ± 123.6a | 6 |
| IV | 0.16 | 0.74 | 1 | 50.5 | 0.82 | 73.2 | 1 |
| V | n.a. | n.a. | 0 | n.a. | n.a. | n.a. | 0 |

1 n.a.: not available.

**Figure S1.** Seasonal variation in fine litterfall components from 2007 to 2009 in a naturally regenerated Korean red pine forest. The values represent mean ± one standard error (*n* = 6).

Note: To estimate the production of litter, five circular litter traps (0.25 m2) for each plot were installed at 1 m above the ground in September 2006. Litterfall was collected monthly from January 2007 through December 2009. To calculate monthly litter production rates during regular periods of one calendar month, the daily litterfall rates were calculated by assuming the rates were the same for every day of the collection period. The collected litterfall was sorted manually into five groups: needle, broad leaf, branch (plus twig), bark, and miscellaneous parts (e.g., cones, very fine fragments). Branches with diameters > 3 cm were not found in the litter traps. Litter components were oven-dried at 75°C and weighed. The sum of these groups is defined as total fine litter.

**Figure S2.** Distribution of coarse woody debris logs according to decay class and diameter size in a naturally regenerated Korean red pine forest.
